# Supplementary material
Source: MDPI journal article supplement (https://www.mdpi.com/1424-2818/9/3/35)
Supplement: s1 [file s1]

## References for Bat-Virus Associations

1. Abraham, J.; Kwong, J.A.; Albariño C.G.; Lu J.G.; Radoshitzky, S.R.; Salazar-Bravo, J.; Farzan, M.; Spiropoulou, C.F.; Chloé, H. Host-species transferrin receptor 1 orthologs are cellular receptors for nonpathogenic new world clade B arenaviruses. *PLoS Pathog.* **2009**, 5, e1000358.
2. Addy, P.; Tukei, P.; Killango, A. The immune status of East African bats to arboviruses. *Proc. 4th Int. Bat Res. Conf.* **1975** Nairobi, Kenya.
3. Aguilar-Setién, A.; Romero-Almaraz, M.L.; Sanchez-Hernandez, C.; Figueroa, R.; Juarez-Palma, L.P.; Garcia-Flores, M.M.; Vazquez-Salinas, C.; Salas-Rojas, M.; Hidalgo-Martinez, A.C.; Pierlé, S.A. Dengue virus in Mexican bats. *Epidemiol. Infect.* **2008**, 136, 1678-1683.
4. Akov, Y.; Goldwasser, R. Prevalence of antibodies to arbovirus in various animals in Israel. *Bulletin of the World Health Organization* **1966**, 34:6, 901.
5. Arguin, P.M.; Murray-Lillibridge, K.; Miranda, M.E.G.; Smith, J.S.; Calaor, A.B.; Rupprecht, C.E. Serologic evidence of Lyssavirus infections among bats, the Philippines. *Emerging Infect. Dis.* **2002**, 8, 258-262.
6. Barman, P.; Ghosh, S.; Samajdar, S.; Mitra, U.; Dutta, P.; Bhattacharya, S.K.; Krishnan, T.; Kobayashi, N.; Naik, T.N. RT-PCR based diagnosis revealed importance of human group B rotavirus infection in childhood diarrhoea. *J. Clin. Vir.* **2006**, 36, 222-227.
7. Beran, G.W.; Steele, K.E. *Handbook of Zoonoses: Viral Zoonoses*. CRC Press: Boca Raton, FL, USA, 1994.
8. Bhat H.R.; Sreenivasan, M.A.; Goverdhan, M.K.; Naik, S.V.; Banerjee, K. Antibodies to Kyasanur forest disease virus in bats in epizootic-epidemic area and neighborhood. *Ind. J. Med. Res.* **1978**, 68, 387-392.
9. Blanton, J.D.; Palmer, D.; Christian, K.A.; Rupprecht, C.E. Rabies surveillance in the United States during 2007. *J. Am. Vet. Med. Assoc.* **2008**, 233, 884.
10. Bunde J.M.; Heske, E.J.; Mateus-Pinilla, N.E.; Hofmann, J.E.; Novak, R.J. A survey for West Nile virus in bats from Illinois. *J. Wildl. Dis.* **2006**, 42(2), 455-458.
11. Cadar D.; Becker, N.; de Mendonca Campos, R.; Börstler, J.; Jöst, H.; Schmidt-Chanasit, J. Usutu virus in bats, Germany, 2013. *Emerging Infect. Dis.* **2014**, 20(10), 1771.
12. Calisher, C.H.; Childs, J.E.; Field, H.E.; Holmes, K.V.; Schountz T. Bats: important reservoir hosts of emerging viruses. *Clin. Microbiol. Rev.* **2006**, 19(3), 531-545.
13. Calisher C.H.; Kinney, R.M.; de Souza Lopes, O.; Trent, D.W.; Monath, T.P.; Franc, D.B. Identification of a new Venezuelan equine encephalitis virus from Brazil. *Am. J. Trop. Med. Hyg.* **1982**, 31(6), 1260-1272.

14. Canuti, M.; Eis-Huebinger, A.M.; Deijis, M.; de Vries, M.; Drexler, J.F.; Oppong, S.K.; Müller, M.A.; Klose, S.M.; Wellingshausen, N.; Cottontail, V.M.; Kalko, E.K. Two novel parvoviruses in frugivorous New and Old World bats. *PLoS ONE* **2011**, *6*(12), e29140.
15. Castilho, J.G.; Canello, F.M.; Scheffer, K.C.; Achkar, S.M.; Carrieri, M.L.; Kotait, I. Antigenic and genetic characterization of the first rabies virus isolated from the bat *Eumops perotis* in Brazil. *Revista do Instituto de Medicina Tropical de São Paulo* **2008**, *50*, 95-99.
16. CDC Arbocat <http://wwwn.cdc.gov/arbocat/>
17. Chu, D.K.W.; Poon, L.L.M.; Chan, K.H.; Chen, H.; Guan, Y.; Yuen, K.Y.; Peiris, J.S.M. Coronaviruses in bent-winged bats (*Miniopterus* spp.). *J. Gen. Virol.* **2006**, *87*(9), 2461-2466.
18. Cisterna, D.; Bonaventura, R.; Caillou, S.; Pozo, O.; Andreau, M.L.; Fontana, L.D.; Echegoyen, C.; de Mattos, C.; de Mattos, C.; Russo, S.; Novaro, L.; Elberger, D.; Freire, M.C. Antigenic and molecular characterization of rabies virus in Argentina. *Virus Res.* **2005**, *109*(2), 139-147
19. Constantine, D.G. An updated list of rabies-infected bats in North America. *J. Wildl. Dis.* **1979**, *15*, 347.
20. Coulanges, P.; Robin, Y.; Le Gonidec, G.; Mayoux, A.; Bordahandy, R. Chiroptères et arbovirus à Madagascar (isolement de souches de virus Dakar-bat—étude sérologique de chauves-souris frugivores). *Les Archives de l'Institut Pasteur de Madagascar* **1974**, *43*, 109-112.
21. Cui, J.; Couter, D.; Shen, D.; Sun, G.; He, H.; Deubel, V.; Zhang, S. Detection of Japanese encephalitis virus antibodies in bats in Southern China. *Am. J. Trop. Med. Hyg.* **2008**, *78*, 1007-1011.
22. Cunha, E.M.S.; Lara, M.D.C.C.S.H.; Nassar, A.F.D.C.; Sodré, M.M.; Amaral L.F.V. [Isolation of rabies virus in *Artibeus fimbriatus* bat in the State of São Paulo, Brazil]. *Revista de Saúde Pública* **2005**, *39*, 683-684.
23. Davis, A.; Bunning, M.; Gordy, P.; Panella, N.; Blitvich, B.; Bowen, R. Experimental and natural infection of North American bats with West Nile virus. *American J. Trop. Med. Hyg.* **2005**, *73*(2), 467-469.
24. de Mattos, C.; Favi, M.; Yung, V.; Pavletic, C.; de Mattos, C.C. Bat rabies in urban centers in Chile. *J. Wildl. Dis.* **2000**, *36*, 231-240.
25. de Rosa, A.; Katoaka, A.P.D.A.G.; Favoretto, S.R.; Sodre, M.M.; Netto, J.T.; Campos, A.C.D.A.; Durigon, E.L.; Martorelli, L.F.A. First report of rabies infection in bats, *Molossus molossus*, *Molossops neglectus* and *Myotis riparius* in the city of São Paulo, state of São Paulo, southeastern Brazil. *Revista da Sociedade Brasileira de Medicina Tropical* **2011**, *44*, 146-149.

26. De Yosti, N.; Lora, C.; Moran, B.; Urbina, R. First report in Peru of paralytic rabies in cattle transmitted by bats. *Revista del Instituto de Zoonosis e Investigacion Pecuaria* **1970**, *1*, 8-18.
27. Drexler, J.F.; Gloza-Rausch, F.; Glende, J.; Corman, V.M.; Muth, D.; Goetsche, M.; Seebens, A.; Niedrig, M.; Pfeiferle, S.; Yordanov, S.; Zhelyazkov, L.; Hermanns, U.; Vallo, P.; Lukashev, A.; Müller, M.A.; Deng, H.; Herrler, G.; Drosten, C. Genomic characterization of severe acute respiratory syndrome-related coronavirus in European bats and classification of coronaviruses based on partial RNA-dependent RNA polymerase gene sequences. *J. Vir.* **2010**, *84*(21), 11336-11349.
28. Drexler, J.F.; Corman, V.M.; Lukashev, A.N.; van den Brand, J.M.; Gmyl, A.P.; Bruenink, S.; Rasche, A.; Seggewi, N.; Feng, H.; Leijten, L.M.; Vallo, P. Evolutionary origins of hepatitis A virus in small mammals. *Proc. Nat. Acad. Sci.* **2015**, *112*(49), 15190-15195.
29. Du, L.; Lu, Z.; Fan, Y.; Meng, K.; Jiang, Y.; Zhu, Y.; Wang, S.; Gu, W.; Zou, X.; Tu, C. Xi River virus, a new bat reovirus isolated in southern China. *Arch. Virol.* **2010**, *155*(8), 1295-1299.
30. Dzikwi, A.A.; Kuzmin, I.I.; Umoh, J.U.; Kwaga, J.K.; Ahmad, A.A.; Rupprecht, C.E. Evidence of Lagos bat virus circulation among Nigerian fruit bats. *J. Wildl. Dis.* **2010**, *46*(1), 267-271.
31. Esona, M.D.; Mijatovic-Rustempasic, S.; Conrardy, C.; Tong, S.; Kuzmin I.V.; Agwanda, B.; Breiman, R.F.; Banyai, K.; Niezgoda, M.; Rupprecht, C.E.; Gentsch, J.R. Reassortant group A rotavirus from straw-colored fruit bat (*Eidolon helvum*). *Emerging Infect. Dis.* **2010**, *16*, 1844-1852.
32. Favoretto S.R.; Carrieri M.L.; Cunha E.M.S.; Aguiar E.A.C.; Silva L.H.Q.; Sodré M.M.; Souza, M.C.A; Kotait, I. Antigenic typing of Brazilian rabies virus samples isolated from animals and humans, 1989-2000. *Revista do Instituto de Medicina Tropical de Sao Paulo* **2002**, *44*, 91-95.
33. Field et al. unpub in Mackenzie J.S. Emerging viral diseases: An Australian perspective. *Emerging Infect. Dis.* **1999**, *5*, 1-8.
34. Fooks, A.R.; Brookes, S.M.; Johnson, N.; McElhinney, L.M.; Hutson, A.M. European bat lyssaviruses: an emerging zoonosis. *Epidemiol. Infect.* **2003**, *131*, 1029-1039.
35. Geevarghese, G.; Banerjee, K. The role of bats in the natural cycle of arbovirus. *Curr. Sci.* **1990**, *59*, 26-31.
36. Gonzalez, J.P.; Ar Gouilh, M.; Reynes, J.M.; Leroy, E.M. Bat-borne viral diseases. *Human health and forests: a global overview of issues, practice and policy* **2008**, 161-196.

37. Goodwin, G.G.; Greenhall, A.M. A review of the bats of Trinidad and Tobago. Descriptions, rabies infection and ecology. *Bulletin of the American Museum of Natural History* **1961**, *122*, 187-302.
38. Gould, A.R.; Kattenbelt, J.A.; Gumley, S.G.; Lunt, R.A. Characterisation of an Australian bat lyssavirus variant isolated from an insectivorous bat. *Virus research* **2002**, *89*, 1-28.
39. Halpin unpub. in Mackenzie, J.S. Emerging viral diseases: an Australian perspective. *Emerging Infect. Dis.* **1999**, *5*, 1-8.
40. Harris, S.; Brookes, S.; Jones, G.; Hutson, A.; Racey, P.; Aegerter, J. European bat lyssaviruses: Distribution, prevalence and implications for conservation. *Biol. Cons.* **2006**, *131*, 193-210.
41. Hayman, D.T.S.; Suu-Ire, R.; Breed, A.C.; McEachern, J.A.; Wang, L.; Wood, J.L.N.; et al. Evidence of henipavirus infection in West African fruit bats. *PLoS ONE* **2008**, *3*, e2739.
42. Hayman, D.T.; Yu, M.; Crameri, G.; Wang, L.F.; Suu-Ire, R.; Wood, J.L.; Cunningham, A.A. Ebola virus antibodies in fruit bats, Ghana, West Africa. *Emerging Infect. Dis.* **2012**, *18*(7), 1207.
43. Herbold, J.R.; Hueschele, W.P.; Berry, R.L.; Parsons, M.A. Reservoir of St. Louis encephalitis virus in Ohio bats. *Am. J. Vet. Res.* **1983**, *44*, 1889-1893.
44. Hsu, V.P.; Hossain, M.J.; Parashar, U.D.; Ali, M.M.; Ksiazek, T.; Kuzmin, I.; Niezgod, M.; Rupprecht, C.; Bresee, J.; Breiman, R.F. Nipah virus encephalitis reemergence, Bangladesh. *Emerging Infect. Dis.* **2004**, *10*(12), 2082.
45. Iehle, C.; Razafitrimo, G.; Razainirina, J.; Andriaholinirina, N.; Goodman, S.M.; Faure, C.; Georges-Courbot, M.; Rousset, D.; Reynes, J. Henipavirus and Tioman virus antibodies in pteropodid bats, Madagascar. *Emerging Infect. Dis.* **2007**, *13*, 159-161.
46. Jiang, Y.; Wang, L.L.; Lu, Z.J.; Xuan, H.; Han, X.H.; Xia, X.Z.; Zhao, F.; Tu, C. Seroprevalence of rabies virus antibodies in bats from southern China. *Vector Borne Zoonotic Dis.* **2010**, *10*, 177-181.
47. Johnson, N.; Vos, A.; Freuling, C.; Tordo, N.; Fooks, A.R.; Müller, T. Human rabies due to lyssavirus infection of bat origin. *Vet. Microbiol.* **2010**, *142*(3), 151-159.
48. Johnsen, D.O.; Edelman, R.; Grossman R.A.; Muangman, D.; Pomsdhit, J.; Gould, D.J. Study Of Japanese encephalitis-virus in Chiangmai valley, Thailand .5. Animal Infections. *Am. J. Epidemiol.* **1974**, *100*, 57-68.
49. Kalunda, M.; Mukwaya, L.G.; Mukuye, A.; Lule M.; Sekyalo, E.; Wright, J.; et al. Kasokero virus - A new human pathogen from bats (*Rousettus aegyptiacus*) In Uganda. *Am. J. Trop. Med. Hyg.* **1986**, *35*, 387-392.
50. Kaul, H.N.; Venkateshan, C.N.; Mishra, A.C.; Modi, G.B.; Ghosh, S.N. Serological evidence of arbovirus activity in birds and small mammals in

Japanese encephalitis affected areas of Bankura district, West Bengal. *Indian J. Med. Res.* **1976**, 64(12), 1735-1739.

51. Kelkar, S.D.; Kadam S.S.; Banerjee K. Hemagglutination inhibition antibodies against Influenza virus in bats. *Ind. J. Med. Res.* **1981**, 74, 147-152.
52. Kemenesi, G.; Zhang, D.; Marton, S.; Dallos, B.; Görföl, T.; Estók, P.; Boldogh, S.; Kurucz, K.; Oldal, M.; Kutas, A.; Bányai, K. Genetic characterization of a novel picornavirus detected in *Miniopterus schreibersii* bats. *J. Gen. Virol.* **2015**, 96(4), 815-821
53. Kemp, G.E.; Moore, D.L.; Causey, O.R.; Odelola, A.; Fabiyi, A. Mokola virus - Further Studies On Iban 27377, a new rabies-related etiological agent of zoonosis in Nigeria. *Am. J. Trop. Med. Hyg.* **1972**, 21, 356.
54. Kim, G.R.; Lee, Y.T.; Park, C.H. A new natural reservoir of hantavirus: isolation of hantaviruses from lung tissues of bats. *Archives de pédiatrie: organe officiel de la Société française de pédiatrie* **1994**, 134, 85-95.
55. Kobayashi, Y.; Sato, G.; Shoji, Y.; Sato, T.; Itou, T.; Cunha, E.M.S.; Samara, S.I., Carvalho, A.A.; Nociti, D.P.; Ito, F.H.; Sakai, T. Molecular epidemiological analysis of bat rabies viruses in Brazil. *J. Vet. Med. Sci.* **2005**, 67, 647-652.
56. Kobayashi, Y.; Suzuki, Y.; Itou, T.; Carvalho, A.A.B.; Cunha, E.M.S.; Ito, F.H.; Gojobori, T.; Sakai, T. Low genetic diversities of rabies virus populations within different hosts in Brazil. *Infect. Genet. Evol.* **2010**, 10, 278-283.
57. Konstantinov, O.K.; Diallo, S.M.; Inapogi, A.P.; Ba, A.; Kamara, S.K. The mammals of Guinea as reservoirs and carriers of arboviruses. *Meditinskaja parazitologija i parazitarnye bolezni* **2006**, 1, 34-39.
58. Kostyukov, M.A. Isolation of two Issyk-Kul virus strains from *Vespertilio pipistrellus* bats in Tadzhikistan. *Med. Zool. Dep. U.S. Naval Med. Res. Unit* **1976**, 1123, 1-2.
59. Kuzmin, I.V.; Niezgoda, M.; Carroll, D.S.; Keeler, N.; Hossain, M.J.; Breiman, R.F.; Ksaizek, T.G.; Rupprecht, C.E. Lyssavirus surveillance in bats, Bangladesh. *Emerging Infect. Dis.* **2006**, 12, 486-488.
60. Kuzmin, I.; Niezgoda, M.; Franka, R.; Agwanda, B.; Markotter, W.; Breiman, R.F. Marburg virus in fruit bat, Kenya. *Emerging Infect. Dis.* **2010**, 16(2), 352.
61. Kuzmin, I.; Rupprecht, C.E. Bat rabies. Handbook of animal models of infection: experimental models in antimicrobial chemotherapy. Academic Press: Cambridge, MA, USA, 1999, 259.
62. Lee, Y.T.; Yun, B.K.; Yoon, J.J. Detection of Puumala and Hantaan viruses among bats in Korea by nested RT-PCR. *J. Korean Soc. Virol.* **1998**, 28, 147-155.
63. Leroy, E.M. Multiple Ebola virus transmission events and rapid decline of central African wildlife. *Science* **2004**, 303, 628-628.

64. Li, Y.; Wang, J.; Hickey, A.C.; Zhang, Y.; Li, Y.; Wu, Y.; Zhang, H.; Yuan, J.; Han, Z.; McEachern, J.; Broder, C.C. Antibodies to Nipah or Nipah-like viruses in bats, China. *Emerging Infect. Dis.* **2008**, *14*, 1974-1976.
65. Lumlertdacha, B.; Boongird, K.; Wanghongsa, S.; Wacharapluesadee, S.; Chanhom, L.; Khawplod, P.; Hemachudha, T.; Kuzmin, I.; Rupprecht, C.E. Survey for bat lyssaviruses, Thailand. *Emerging Infect. Dis.* **2005**, *11*, 232-236.
66. Lvov, D.V.; Karas, F.R.; Timofeev, E.; Tsyarkin, Y.M.; Vargina, S.; Veselovskaya, O.V.; Osipova, N.Z.; Grebenyuk, Y.I.; Gromashevski, V.L.; Steblyanko, S.N.; Fomina, K.B. Issyk-kul virus, a new arbovirus isolated from bats and *Argas vespertillionis* in Kirghiz SSR. *Achiv fur die Gesamte Virusforschung* **1973**, *42*, 207-209.
67. Machain-Williams, C.; López-Urbe, M.; Talavera-Aguilar, L.; Carrillo-Navarrete, J.; Vera-Escalante, L.; Puerto-Manzano, F.; Ulloa, A.; Farfán-Ale, J.A.; Garcia-Rejon, J.; Blitvich, B.J.; Loroño-Pino, M.A. Serologic evidence of flavivirus infection in bats in the Yucatan peninsula of Mexico. *J. Wildl. Dis.* **2013**, *49*(3), 684-689.
68. Mackenzie, J.S.; Chua, K.B.; Daniels, P.W.; Eaton, B.T.; Field, H.E.; Hall, R.A.; Halpin, K.; Johansen, C.A.; Kirkland, P.D.; Lam, S.K.; McMinn, P. Emerging viral diseases of Southeast Asia and the Western Pacific. *Emerging Infect. Dis.* **2001**, *7*, 497-504.
69. Mackenzie, J.S. Emerging viral diseases: An Australian perspective. *Emerging Infect. Dis.* **1999**, *5*, 1-8.
70. Main, A.J. Virologic And serologic survey for eastern equine encephalomyelitis and certain other viruses in colonial bats of New-England. *J. Wildl. Dis.* **1979**, *15*, 455-466.
71. Markotter, W.; Kuzmin, I.; Rupprecht, C.E.; Nel, L.H. Phylogeny of Lagos bat virus: challenges for lyssavirus taxonomy. *Virus Res.* **2008**, *135*, 10-21.
72. Martorellim, L.; Kataoka, A.; Almeida, M.; Trezza-Netto, J.; Sodré, M.; Gama, A. Antigenic characterization of rabies virus isolated in bats from cities of São Paulo state, Brazil during 1988 to 2009. International Meeting on Research Advances and Rabies Control in the Americas: Quebec, CAN. 2009.
73. Metselaar, D.; Williams, M.C.; Simpson, D.I.H.; West, R.; Mutere, F.A. Mount Elgon bat virus - a hitherto undescribed virus from *Rhinolophus hildebrandti eloquens*. *Archiv fur die Virusforschung* **1969**, *26*, 183.
74. Miura, T.; Toyokawa, K.; Allen, R.; Sulkin, S.E. Studies Of arthropod-borne virus infections in Chiroptera .7. Serologic evidence of natural Japanese-B-encephalitis virus infection in bats. *Am. J. Trop. Med. Hyg.* **1970**, *19*, 77-87.
75. Miura, T.; Kitaoka, M. Viruses isolated from bats in Japan. *Arch. Virol.* **1977**, *53*(4), 281-286.

76. Müller, T.; Cox, J.; Peter, W.; Schäfer, R.; Johnson, N.; McElhinney, L.M.; Geue, J.L.; Tjørnehøj, K.; Fooks, A.R. Spill-over of European bat lyssavirus type 1 into a stone marten (*Martes foina*) in Germany. *J. Vet. Med.* **2004**, *51*, 49-54.
77. Muller, T.; Johnson, N.; Freuling, C.M.; Fooks, A.R.; Selhorst, T.; Vos, A. Epidemiology of bat rabies in Germany. *Arch. Virol.* **2007**, *152*, 273-288.
78. Nadin-Davis, S.; Huang, W.; Armstrong, J.; Casey, G.; Bahloul, C.; Tordo, N., et al. Antigenic and genetic divergence of rabies viruses from bat species indigenous to Canada. *Virus Res.* **2001**, *74*, 139-156.
79. Negredo, A.; Palacios, G.; Vázquez-Morón, S.; González, F.; Dopazo, H.; Molero, F.; Juste, J.; Quetglas, J.; Savji, N.; de la Cruz Martínez, M.; Herrera, J.E. Discovery of an ebolavirus-like filovirus in Europe. *PLoS Pathog.* **2011**, *7*(10), e1002304.
80. Nunes, K.N.; da Rosa, E.S.T.; Barbosa, T.F.; Pereira, A.S.; Medeiros, D.B.; Casseb, L.M., et al. Genetic characterization of the rabies virus strain Qr 18867 (Rhabdoviridae, Lyssavirus) isolated from the *Uroderma Bilobatum* bat in Portel municipality, Para State, 2004. *Am. J. Trop. Med. Hyg.* **2008**, *79*, 213-213.
81. O'Connor, J.; Rowan, I.; Lawrence, J. Relationships between the flying fox (genus *Pteropus*) and arthropod-borne fevers of north Queensland. *Nature* **1955**, *176*, 472.
82. Ogawa, H.; Miyamoto, H.; Nakayama, E.; Yoshida, R.; Nakamura, I.; Sawa, H.; Ishii, A.; Thomas, Y.; Nakagawa, E.; Matsuno, K.; Kajihara, M. Seroepidemiological prevalence of multiple species of filoviruses in fruit bats (*Eidolon helvum*) migrating in Africa. *J. Infect. Dis.* **2015**, *212*, 101–108.
83. Olival, K.J.; Islam, M.R.; Yu, M.; Anthony, S.; Epstein, J.H.; Khan, S.A.; Crameri, G.; Wang, L.F.; Lipkin, W.I. Ebolavirus antibodies in fruit bats, Bangladesh. *Emerging Infect. Dis.* **2013**, *19*, 270-273.
84. Osborne, J.C.; Rupprecht, C.E.; Olson, J.G.; Ksiazek, T.G.; Rollin, P.E.; Niezgodna, M.; Goldsmith, C.S.; An, U.S.; Nichol, S.T. Isolation of Kaeng Khoi virus from dead *Chaerephon plicata* bats in Cambodia. *J. Gen. Virol.* **2003**, *84*, 2685-2689.
85. Paez, A.; Nunez, C.; Garcia, C.; Boshell, J. Molecular epidemiology of rabies epizootics in Colombia: evidence for human and dog rabies associated with bats. *J. Gen. Virol.* **2003**, *84*, 795-802.
86. Pal, S.R.; Arora, B.; Chhuttani, P.N.; Broor, S.; Choudhury, S.; Joshi, R.M.; Ray, S.D. Rabies virus infection of a flying fox bat, *Pteropus poliocephalus* in Chandigarh, Northern India. *Trop. Geograph. Med.* **1980**, *32*, 265-267.
87. Passos, E.C.; Carrieri, M.L.; Dainovskas, E.; Camara, M.; Silva, M.M.S. Isolation of rabies virus in an insectivorous bat *Nyctinomops macrotis*, in southeastern Brazil. *Revista De Saude Publica* **1998**, *32*, 74–76.

88. Paul, S.D.; Rajagopalan, P.K.; Sreenivasan, M.A. Isolation of the West Nile virus from the frugivorous bat, *Rousettus leschenaulti*. *Ind. J. Med. Res.* **1970**, *58*, 1169.
89. Philbey, A.W.; Kirkland, P.D.; Ross, A.D.; Davis, R.J.; Gleeson, A.B.; Love, R.J.; Daniels, P.W.; Gould, A.R.; Hyatt, A.D. An apparently new virus (family Paramyxoviridae) infectious for pigs, humans, and fruit bats. *Emerging Infect. Dis.* **1998**, *4*, 269-271.
90. Picard-Meyer, E.; Servat, A.; Robardet, E.; Moinet, M.; Borel, C.; Cliquet, F. Isolation of Bokeloh bat lyssavirus in *Myotis nattereri* in France. *Arch. Virol.* **2013**, *158*(11), 2333.
91. Pilipski, J.D.; Pilipski, L.M.; Risley, L.S. West Nile virus antibodies in bats from New Jersey and New York. *J. Wildl. Dis.* **2004**, *40*, 335-337.
92. Pourrut, X.; Souris, M.; Towner, J.S.; Rollin, P.E.; Nichol, S.T.; Gonzalez, J.P., Leroy, E. Large serological survey showing cocirculation of Ebola and Marburg viruses in Gabonese bat populations, and a high seroprevalence of both viruses in *Rousettus aegyptiacus*. *BMC Infect. Dis.* **2009**, *9*, 159.
93. Price, J.L. Isolation Of Rio Bravo and a hitherto undescribed agent, Tamana bat virus, from insectivorous bats in Trinidad, with serological evidence of infection in Bats And Man. *Am. J. Trop. Med. Hyg.* **1978**, *27*, 153-161.
94. Price, J.L. Serological evidence of infection of Tacaribe Virus and arboviruses in Trinidadian bats. *Am. J. Tropical Med. Hyg.* **1978**, *27*, 162-167.
95. Price J.L.; Everard, C.O.R. Rabies virus and antibody in bats in Grenada and Trinidad. *J. Wildl. Dis.* **1977**, *13*, 131-134.
96. Pritchard, L.I.; Chua, K.B.; Cummins, D.; Hyatt, A.; Crameri, G.; Eaton, B.T.; Wang, L.F. Pulau virus; a new member of the Nelson Bay orthoreovirus species isolated from fruit bats in Malaysia. *Arch. Virol.* **2006**, *151*(2), 229-239.
97. Queiroz, L.H.; de Carvalho, C.; Buso, D.S.; de Lucca Ferrari, C.I.; Pedro, W.A. Perfil epidemiológico da raiva na região Noroeste do Estado de São Paulo no período de 1973 a 2007. *Revista da Sociedade Brasileira de Medicina Trop.* **2009**, *42*(1), 9-14.
98. Rowan, L.C.; O'Connor, J.L. Relationship between some coastal fauna And arthropod-borne fevers of North-Queensland. *Nature* **1957**, *179*, 786-787.
99. Sabattini, M.S.; Shope, R.E.; Vanella, J.M. Serological survey for arboviruses in Cordoba Province Argentina. *Am. J. Trop. Med. Hyg.* **1965**, *14*, 1073-1078.
100. Salas-Rojas, M.; Sanchez-Hernandez, C.; Romero-Almaraz, M.L.; Schnell, G.; Schmid, R.; Aguilar-Setién, A. Prevalence of rabies and LPM paramyxovirus antibody in non-hematophagous bats captured in the central Pacific coast of Mexico. *Trans. Roy. Soc. Trop. Med. Hyg.* **2004**, *98*, 577-584.



101. Selimov, M.A.; Smekhov, A.M.; Antonova, L.A.; Shablovskaya, E.A.; King, A.A.; Kulikova, L.G. New strains Of rabies-related viruses isolated from bats in the Ukraine. *Acta Vir.* **1991**, *35*, 226-231.
102. Serra-Cobo, J.; Amengual, B.; Abellán, C.; Bourhy, H. European bat lyssavirus infection in Spanish bat populations. *Emerging Infect. Dis.* **2002**, *8*, 413-420.
103. Seymour, C.; Dickerman, R.W.; Martin, M.S. Venezuelan encephalitis virus infection in neotropical bats. *Am. J. Trop. Med. Hyg.* **1978**, *27*, 290.
104. Scheffer, K.C.; Carrieri, M.L.; Albas, A.; dos Santos, H.C.P.; Kotait, I; Ito, F.H. Rabies virus in naturally infected bats in the state of Sao Paulo, southeastern Brazil. *Revista De Saude Publica* **2007**, *41*, 389-395.
105. Sheeler-Gordon, L.L.; Smith, J.S. Survey of bat populations from Mexico and Paraguay for rabies. *J. Wildl. Dis.* **2001**, *37*, 582-593.
106. Shepherd, R.C.; Williams, M.C. Studies on viruses in East African bats (Chiroptera). 1. Haemagglutination inhibition and circulation of arboviruses. *Zoo. Res.* **1964**, *3*(3), 125-39.
107. Shi, Z.L. Bat and virus. *Prot. Cell* **2010**, *1*, 109-114.
108. Silva, R.; Alencar, O. Isolamento de vírus rábico das glândulas salivares de morcegos carnívoros da espécie *Chrotopterus auritus australis* (Thomas). *Veterinária: Rio de Janeiro* **1968**, *21*, 7–10.
109. Simpson, D.; Williams, M.; O'Sullivan, J.; Cunningham, J.; Mutere, F. Studies on arboviruses and bats (Chiroptera) in East Africa. II. Isolation and haemagglutination-inhibition studies on bats collected in Kenya and throughout Uganda. *Ann. Trop. Med. Parasit.* **1968**, *62*, 432-440.
110. Smith, P.C.; Lawhaswa, K.; Vick, W.E.; Stanton, J.S. Isolation of rabies virus from fruit bats in Thailand. *Nature* **1967**, *216*, 384.
111. Sodre, M.M.; da Gama, A.; de Almeida, M. Updated list of bat species positive for rabies in Brazil. *Revista da Sociedade Brasileira de Medicina Tropical* **2010**, *52*, 75–81.
112. Sonntag, M.; Mühldorfer, K.; Speck, S.; Wibbelt, G.; Kurth, A. New adenovirus in bats, Germany. *Emerging Infect. Dis.* **2009**, *15*(12), 2052.
113. Speare, R.; Skerratt, L.; Foster, R.; Berger, L.; Hooper, P.; Lunt R, et al. Australian bat lyssavirus Infection in three fruit bats from north Queensland. *Comm. Dis. Intell.* **1997**, *21*, 117–120.
114. Streicker, D.; Turmelle, A.; Vonhof, M.; Kuzmin, I.; McCracken, G.; Rupprecht, C.E. Host phylogeny constrains cross-species emergence and establishment of rabies virus in bats. *Science* **2010**, *329*, 676.
115. Stutz, W.H.; Albuquerque, M.C.; Uieda, W.; Macedo, E.M.; França, C.B. Updated list of Uberlândia bats (Minas Gerais State, southeastern Brazil). *Chiropt. Neotropical* **2014**, *10*, 188–190.

116. Sudia, W.D.; Newhouse, V.F. Epidemic Venezuelan equine encephalitis In North-America - summary of virus-vector-host relationships. *Am. J. Epidemiol.* **1975**, *101*, 1–13.
117. Sulkin S.E.; Allen, R. Virus infections in bats. *Mono. Vir.* **1974**, *8*, 1–103.
118. Swanepoel, R.; Smit, S.B.; Rollin, P.E.; Formenty, P.; Leman, P.A.; Kemp, A.; Burt, F.J.; Grobblear, A.A.; Croft, J.; Bausch, D.G.; Zeller, H. Studies of reservoir hosts for Marburg virus. *Emerging Infect. Dis.* **2007**, *13*, 1847–1851.
119. Tajima, S.; Takasaki, T.; Matsuno, S.; Nakayama, M.; Kurane, I. (2005). Genetic characterization of Yokose virus, a flavivirus isolated from the bat in Japan. *Virology* **2005**, *332*, 38–44.
120. Taniguchi, S.; Watanabe, S.; Masangkay, J.S.; Omatsu, T.; Ikegami, T., Alviola, P.; Ueda, N.; Iha, K.; Fujii, H.; Ishii, Y.; Mizutani, T. Reston Ebolavirus antibodies in bats, the Philippines. *Emerging Infect. Dis.* **2011**, *17*(8), 1559.
121. Taylor, L.H.; Latham, S.M.; Mark, E. Risk factors for human disease emergence. *Phil. Trans. Roy. Soc. London B: Bio. Sci.* **2001**, *356*, 983-989.
122. Tesh, R.B.; Peralta, P.H.; Johnson K.M. Ecologic studies of vesicular stomatitis virus. I. Prevalence of infection among animals and humans living in an area of endemic VSV activity. *Am. J. Epidemiol.* **1969**, *90*, 255-261.
123. Thompson, N.N.; Auguste, A.J., Travassos da Rosa, A.P.A.; Carrington, C.V.F., Blitvich, B.J., Chadee, D.D., Tesh, R.B.; Weaver, S.C.; Adesiyun, A.A. Seroepidemiology of selected alphaviruses and flaviviruses in bats in Trinidad. *Zoo. Pub. Health* **2015**, *62*(1), 53-60.
124. Tomaz, L.A.G.; Zortea, M.; de Souza A.M.; Jayne V. Isolation of the rabies virus in *Carollia perspicillata* in central Brazil. *Chiropt. Neotropical* **2007**, *13*, 309-312.
125. Ubico, S.R.; Mclean R.G. Serologic survey of neotropical bats in Guatemala for virus antibodies. *J. Wildl. Dis.* **1995**, *31*, 1-9.
126. Wacharapluesadee, S.; Lumlertdacha, B.; Boongird, K.; Wanghongsa, S.; Chanhom, L.; Rollin, P.; Stockton, P.; Rupprecht, C.E.; Ksiazek, T.G.; Hemachudha, T. Bat Nipah virus, Thailand. *Emerging Infect. Dis.* **2005**, *11*, 1949-1951.
127. Wang, J.L.; Pan, X.L.; Zhang, H.L.; Fu, S.H; Wang, H.Y.; Tang Q; Wang, L.F.; Liang, G. Japanese encephalitis viruses from bats in Yunnan, China. *Emerging Infect. Dis.* **2009**, *15*, 939-942.
128. Wardeh, M.; Risley, C.; McIntyre, M.K.; Setzkorn, C.; Baylis, M. Database of host-pathogen and related species interactions, and their global distribution. *Sci. Data* **2015**, *2*, 150049.
129. Watanabe, S.; Masangkay, J.S.; Nagata, N., Morikawa, S., Mizutani, T., Fukushi, S.; Alviola, P.; Omatsu, T.; Ueda, N.; Iha, K.; Taniguchi, S. Bat

coronaviruses and experimental infection of bats, the Philippines. *Emerging Infect. Dis.* **2010**, *16*(8), 1217.

130. WHO. Nipah Virus Infection. *International Journal of Epidemiology*
131. Wong, S.; Lau, S.; Woo, P.; Yuen, K-y. Bats as a continuing source of emerging infections in humans. *Reviews Medical Virol.* **2007**, *17*, 67-91.
132. Wright, E.; Hayman, D.T.; Vaughan, A.; Temperton, N.J.; Wood, J.L., Cunningham, A.A.; Suu-Ire, R.; Weiss, R.A.; Fooks, A.R. Virus neutralising activity of African fruit bat (*Eidolon helvum*) sera against emerging lyssaviruses. *Virology* **2010**, *408*(2), 183-189.
133. Yang, X.L.; Zhang, Y.Z.; Jiang, R.D.; Guo, H.; Zhang, W.; Li, B.; Wang, N., Wang, L.; Waruhiu, C.; Zhou, J.H.; Li, S.Y. Genetically diverse filoviruses in *Rousettus* and *Eonycteris* spp. bats, China, 2009 and 2015. *Emerging Infect. Dis.* **2017**, *23*(3), 482.
134. Yu, L.; Zi, Y.; Li, D.; Zhang, Z.; Cui, W.; Zhiwei, W. Isolation of Chikungunya virus from bat in Yunnan province and serological investigations. *Chin. J. Virol.* **1989**, *5*, 31-36.
135. Yuan, J.; Zhang, Y.; Li, J.; Zhang, Y.; Wang, L.F.; Shi, Z. Serological evidence of Ebolavirus infection in bats, China. *Virology* **2012**, *9*(1), 236.
136. Yun, B.K.; Yoon, J.J.; Lee, Y.T. Partial sequence analysis of Puumala virus M segment from bats in Korea. *J. Korean Soc. Virol.* **1999**, *29*, 23-31.
