# Supplementary material
Source: MDPI journal article supplement (https://www.mdpi.com/1424-2818/9/3/35)
Supplement: s1 [file s1]

## References for Cave- and Co- Roosting Behavior

1. Sagot, M.; Chaverri, G. Effects of roost specialization on extinction risk in bats. *Cons. Biol.* **2015**, 29(6), 1666-1673.
2. Hermanson, J.W.; O'Shea, T.J. *Antrozous pallidus*. *Mamm. Species* **1983**, 213, 1-8.
3. Brunet, A.K.; Medellín, R.A. The species–area relationship in bat assemblages of tropical caves. *J. Mamm.* **2001**, 82(4), 1114-1122.
4. Greenhall, A.M.; Joermann, G.; Schmidt, U. *Desmodus rotundus*. *Mamm. Species* **1983**, 202, 1-6.
5. Cloutier, D.; Thomas, D. W. *Carollia perspicillata*. *Mamm. Species* **1992**, 417, 1-9.
6. Phelps, K.; Jose, R.; Labonite, M.; Kingston, T. Correlates of cave-roosting bat diversity as an effective tool to identify priority caves. *Biolog. Cons.* **2016**, 201, 201-209.
7. Greenhall, A.M.; Schmidt, U.; Joermann, G. *Diphylla ecaudata*. *Mamm. Species* **1984**, 227, 1-3.
8. Alvarez, J.; Willig, M.R.; Jones, J.K. *Glossophaga soricina*. *Mamm. Species* **1991**, 379, 1-7.
9. Hensley, A.P.; Wilkins, K.T. *Leptonycteris nivalis*. *Mamm. Species* **1988**, 307, 1-4.
10. Cole, F. R.; Wilson, D.E. *Leptonycteris curasoae*. *Mamm. Species* **2006**, 796, 1-3.
11. Fleming, T.H.; Nelson, A.A.; Dalton, V.M. Roosting behavior of the lesser long-nosed bat, *Leptonycteris curasoae*. *J. Mammal.* **1998**, 79, 147-155.
12. Alonso-Mejía, A.; Medellín, R.A. *Micronycteris megalotis*. *Mamm. Species* **1991**, 376, 1-6.
13. Wilson, D.E.; LaVal, R.K. *Myotis nigricans*. *Mamm. Species* **1974**, 39, 1-3.
14. O'Farrell, M.J.; Studier, E.H. *Myotis thysanodes*. *Mamm. Species* **1980**, 137, 1-5.
15. Fitch, J.H.; Shump, K.A.; Shump, A.U. *Myotis velifer*. *Mamm. Species* **1981**, 149, 1-5.
16. Taddei, V.A.; Uieda, W. Distribution and morphometrics of *Natalus stramineus* from South America (Chiroptera, Natalidae). *Iheringia. Série Zoologia* **2001**, 91, 123-132.
17. Herd, R. M. *Pteronotus parnellii*. *Mamm. Species* **1983**, 209, 1-5.
18. Simmons, N. B. Order Chiroptera. Mammal species of the world: a taxonomic and geographic reference. **2005**, 1, 312-529.
19. Greenhall, A.M.; Schutt, W.A. *Diaemus youngi*. *Mamm. Species* **1996**, 533, 1-7.
20. Fenton, M. B.; Bernard, E.; Bouchard, S.; Hollis, L.; Johnston, D. S.; Lausen, C. L.; Ratcliffe, M.; Riskin, D.K.; Taylor, J.R.; Zigouris, J. The bat fauna of Lamanai, Belize: roosts and trophic roles. *J. Trop. Ecol.* **2001**, 17(4), 511-524.
21. Hollis, L. *Artibeus planirostris*. *Mamm. Species* **2005**, 775, 1-6.
22. DeFrees, S.L.; Wilson, D.E. *Eidolon helvum*. *Mamm. Species* **1988**, 312, 1-5.
23. Boulay, M.C.; Robbins, C.B. *Epomophorus gambianus*. *Mamm. Species* **1989**, 344, 1-5.
24. Best, T.L.; Hunt, J.L.; McWilliams, L.A.; Smith, K.G. *Eumops auripendulus*. *Mammalian Species*, **2002**, 708, 1-5.
25. Best, T.L.; Kiser, W.M.; Rainey, J.C. *Eumops glaucinus*. *Mamm. Species* **1997**, 551, 1-6.
26. Hunt, J.L.; McWilliams, L.A.; Best, T.L.; Smith, K.G. *Eumops bonariensis*. *Mamm. Species*, **2003**, 733, 1-5.
27. Wilkins, K.T. *Tadarida brasiliensis*. *Mamm. Species* **1989**, 331, 1-10.
28. Kunz, T.H.; Martin, R.A. *Plecotus townsendii*. *Mamm. Species* **1982**, 175, 1-6.
29. Rezsutek, M.; Cameron, G.N. *Mormoops megalophylla*. *Mamm. Species* **1993**, 448, 1-5.
30. Andriafidison, D.; Cardiff, S.G.; Goodman, S.M.; Hutson, A.M.; Jenkins, R.K.B.; Kofoky, A.F.; Racey, P.A.; Ranivo, J.; Ratrimomanarivo, F.H.; Razafimanahaka, H.J. *Eidolon dupreanum*. The IUCN Red List of Threatened Species **2008**, e.T7083A12824774. <http://dx.doi.org/10.2305/IUCN.UK.2008.RLTS.T7083A12824774.en>. Downloaded on 27 February 2017.

31. Acharya, L. *Epomophorus wahlbergi*. *Mamm. Species* **1992**, 394, 1-4.
32. Watkins, L.C. *Euderma maculatum*. *Mamm. Species* **1977**, 77, 1-4.
33. Ceballos, G.; Medellín, R.A. *Dididurus albus*. *Mamm. Species*, **1988**, 316, 1-4.
34. Kurta, A. *Eptesicus fuscus*. *Mamm. Species*, **1990**, 356, 1-10.
35. Handley, C.O.; Soriano, P.J. *Glossophaga longirostris*. *Mamm. Species* **1998**, 576, 1-5.
36. Best, T.L.; Kiser, W.M.; Freeman, P.W. *Eumops perotis*. *Mamm. Species* **1996**, 534, 1-8.
37. Rydell, J.; Baagøe, H.J. *Vespertilio murinus*. *Mamm. Species*. **1994**, 467, 1-6.
38. Baker, R.J.; Clark, C.L. *Uroderma bilobatum*. *Mamm. Species* **1987**, 279, 1-4.
39. Timm, R.M. *Artibeus phaeotis*. *Mamm. Species* **1985**, 235, 1-6.
40. Bates, P.; Bumrungsri, S.; Walston, J.; Molur, S.; Srinivasulu, C. *Taphozous theobaldi*. The IUCN Red List of Threatened Species **2008**, e.T21465A9283242.  
<http://dx.doi.org/10.2305/IUCN.UK.2008.RLTS.T21465A9283242.en>. Downloaded on 26 February 2017."
41. Webster, W.D.; Jones, J.K. *Artibeus toltecus*. *Mamm. Species* **1982**, 178, 1-3.
42. Mies, R.; Kurta, A.; King, D.G. *Eptesicus furinalis*. *Mamm. Species* **1996**, 526, 1-7.
43. Wright, G.S. *Hipposideros caffer* (Chiroptera:Hipposideridae). *Mamm. Species*, **2009**, 845, 1-9.
44. Langevin, P. *Hypsignathus monstrosus*. *Mamm. Species* **1990**, 357, 1-4.
45. Kunz, T.H. *Lasionycteris noctivagans*. *Mamm. Species* **1982**, 172, 1-5.
46. Shump, K.A.; Shump, A.U. *Lasiurus borealis*. *Mamm. Species* **1982**, 183, 1-6.
47. Shump, K.A.; Shump, A.U. *Lasiurus cinereus*. *Mamm. Species* **1982**, 185, 1-5.
48. Kurta, A.; Lehr, G.C. *Lasiurus ega*. *Mamm. Species* **1995**, 515, 1-7.
49. Jones, J.K.; Baker, R.J. *Lasiurus intermedius*. *Mamm. Species* **1980**, 132, 1-3.
50. Wilkins, K.T. *Lasiurus seminolus*. *Mamm. Species*, **1987**, 280, 1-5.
51. Owen-Ashley, N.T.; Wilson, D.E. *Micropteropus pusillus*. *Mamm. Species* **1998**, 577, 1-5.
52. Braun, J.K.; Layman, Q.D.; Mares, M.A. *Myotis albescens* (Chiroptera: Vespertilionidae). *Mamm. Species* **2009**, 846, 1-9.
53. Jones, C.; Manning, R.W. *Myotis austroriparius*. *Mamm. Species* **1989**, 332, 1-3.
54. O'Farrell, M.J.; Bradley, W.G. Activity patterns of bats over a desert spring. *J. Mamm.* **1970**, 51(1), 18-26.
55. Bogdanowicz, W. *Myotis daubentonii*. *Mamm. Species* **1994**, 475, 1-9.
56. Manning, R.W.; Jones, J.K. *Myotis evotis*. *Mamm. Species* **1989**, 329, 1-5.
57. Decher, J.; Choate, J.R. *Myotis grisescens*. *Mamm. Species* **1995**, 510, 1-7.
58. Fitch, J.H.; Shump, K.A. *Myotis keenii*. *Mamm. Species* **1979**, 121, 1-3.
59. Best, T.L.; Jennings, J.B. *Myotis leibii*. *Mamm. Species* **1997**, 547, 1-6.
60. Hood, C.S.; Jones, J.K. *Noctilio leporinus*. *Mamm. Species* **1984**, 216, 1-7.
61. Fenton, M.B. *Myotis lucifugus*. *Mamm. Species*, **1980**, 142, 1-8.
62. Caceres, M.C.; Barclay, R.M. *Myotis septentrionalis*. *Mamm. Species* **2000**, 634, 1-4.
63. Warner, R.M.; Czaplewski, R.W. *Myotis volans*. *Mamm. Species* **1984**, 224, 1-4.
64. Gray, P.A.; Fenton, M.B.; Cakenberghe V.V. *Nycteris thebaica*. *Mamm. Species* **1999**, 612, 1-8.
65. Watkins, L.C. *Nycticeius humeralis*. *Mamm. Species* **1972**, 23, 1-4.
66. Avila-Flores, R.; Flores-Martínez, J.J.; Ortega, J. *Nyctinomops laticaudatus*. *Mamm. Species* **2002**, 697, 1-6.
67. Milner, J.; Jones, C.; Jones, J.K. *Nyctinomops macrotis*. *Mamm. Species* **1990**, 351, 1-4.
68. Santos, M.; Aguirre, L.F.; Vázquez, L.B.; Ortega, J. *Phyllostomus hastatus*. *Mamm. Species*, **2003**, 722, 1-6.
69. Fujita, M.S.; Kunz, T.H. *Pipistrellus subflavus*. *Mamm. Species* **1984**, 228, 1-6.
70. Pearl, D.L. *Rhinolophus hildebrandi*. *Mamm. Species* **1994**, 486, 1-3.

71. Plumpton, D.L.; Jones, J.K. *Rhynchonycteris naso*. *Mamm. Species* **1992**, *413*, 1-5.
72. Kwiecinski, G.G.; Griffiths, T.A. *Rousettus aegyptiacus*. *Mamm. Species*, **1999**, *611*, 1-9.
73. Gannon, M.R.; Willig, M.R.; Jones, J.K. *Sturnira lilium*. *Mamm. Species* **1989**, *333*, 1-5.
74. Willis, K.B.; Willig, M.R.; Jones, J.K. *Vampyroides caraccioli*. *Mamm. Species*, **1990**, *359*, 1-4.
75. McClure, H.E.; Lim, B.L.; Winn, S.E. Fauna of the Dark Cave, Batu Caves, Kuala Lumpur, Malaysia. *Pacific Insects* **1967**, *9*(3), 399-428.
76. Stubbe, M.; Samiya, R.; Ariunbold, J.; Buuveibaatar, V.; Dorjderem, S.; Monkhzul, T., Otgonbaatar, M.; Tsogbadrakh, M. *Vespertilio sinensis*. The IUCN Red List of Threatened Species **2008**, e.T22949A9401797.  
[doi.org/10.2305/IUCN.UK.2008.RLTS.T22949A9401797.en](https://doi.org/10.2305/IUCN.UK.2008.RLTS.T22949A9401797.en). Downloaded on 01 March 2017.
77. Kock, D.; Sami Amr, Z.; Mickleburgh, S.; Hutson, A.M.; Bergmans, W.; Molur, S. *Taphozous perforatus*. The IUCN Red List of Threatened Species **2008**, e.T21463A9282975.  
[doi.org/10.2305/IUCN.UK.2008.RLTS.T21463A9282975.en](https://doi.org/10.2305/IUCN.UK.2008.RLTS.T21463A9282975.en). Downloaded on 01 March 2017.
78. Csorba, G.; Bumrungsri, S.; Helgen, K.; Francis, C.; Bates, P.; Gumal, M.; Balete, D.; Heaney, L.; Molur, S.; Srinivasulu, C. *Taphozous melanopogon*. The IUCN Red List of Threatened Species **2008**, e.T21461A9281177.  
[doi.org/10.2305/IUCN.UK.2008.RLTS.T21461A9281177.en](https://doi.org/10.2305/IUCN.UK.2008.RLTS.T21461A9281177.en). Downloaded on 01 March 2017.
79. Qumsiyeh, M.B.; Amr, Z.S.; Al-oran, R.M. Further records of bats from Jordan and a synopsis. *Turkish J. Zoo.* **1998**, *22*(4), 277-284.
80. Mickleburgh, S.; Hutson, A.M.; Racey, P.A.; Ravino, J.; Bergmans, W.; Cotterill, F.P.D.; Gerlach, J. *Chaerephon pumilus*. The IUCN Red List of Threatened Species **2014**, e.T4317A67362329. <http://dx.doi.org/10.2305/IUCN.UK.2014-3.RLTS.T4317A67362329.en>. Downloaded on 01 March 2017.
81. Winkelmann, J.R.; Bonaccorso, F.J.; Strickler, T.L. Home range of the southern blossom bat, *Syconycteris australis*, in Papua New Guinea. *J. Mamm.* **2000**, *81*(2), 408-414.
82. Bonaccorso, F.; Helgen, K.; Hamilton, S. *Pteropus admiralitatum*. The IUCN Red List of Threatened Species **2008**, e.T18713A8508703.  
<http://dx.doi.org/10.2305/IUCN.UK.2008.RLTS.T18713A8508703.en>. Downloaded on 01 March 2017.
83. Hamilton, S.; Bonaccorso, F.; Helgen, K.; Allison, A. *Pteropus capistratus*. The IUCN Red List of Threatened Species **2010**, e.T136373A4282456. <http://dx.doi.org/10.2305/IUCN.UK.2010-2.RLTS.T136373A4282456.en>. Downloaded on 01 March 2017.
84. Helgen, K.; Salas, L.; Bonaccorso, F. *Pteropus conspicillatus*. The IUCN Red List of Threatened Species **2008**, e.T18721A8510243.  
<http://dx.doi.org/10.2305/IUCN.UK.2008.RLTS.T18721A8510243.en>. Downloaded on 01 March 2017.
85. Molur, S.; Srinivasulu, C.; Bates, P.; Francis, C. *Pteropus giganteus*. The IUCN Red List of Threatened Species **2008**, e.T18725A8511108.  
<http://dx.doi.org/10.2305/IUCN.UK.2008.RLTS.T18725A8511108.en>. Downloaded on 01 March 2017.
86. Bumrungsri, S.; Suyanto, A.; Francis, C. *Pteropus lylei*. The IUCN Red List of Threatened Species **2008**, e.T18734A8513517.  
<http://dx.doi.org/10.2305/IUCN.UK.2008.RLTS.T18734A8513517.en>. Downloaded on 01 March 2017.
87. Racey, P.A. *Pteropus rufus*. The IUCN Red List of Threatened Species **2016**, e.T18756A22087230. <http://dx.doi.org/10.2305/IUCN.UK.2016-1.RLTS.T18756A22087230.en>. Downloaded on 01 March 2017.
88. Solari, S. *Mimon crenulatum*. The IUCN Red List of Threatened Species **2015**,

- e.T13560A22105694. <http://dx.doi.org/10.2305/IUCN.UK.2015-4.RLTS.T13560A22105694.en>. Downloaded on 01 March 2017.
89. Oprea, M.; Aguiar, L.M.; Wilson, D.E. *Anoura caudifer* (Chiroptera: Phyllostomidae). *Mamm. Species* **2009**, *844*, 1-8.
90. Haynes, M.A.; Lee, T.E., Jr. *Artibeus obscurus*. *Mammal. Species* **2009**, *752*, 1-5.
91. Bates, P.; Bumrungsri, S.; Francis, C.; Csorba, G.; Furey, N. *Aselliscus stoliczkanus*. The IUCN Red List of Threatened Species **2008**, e.T2155A9300617. <http://dx.doi.org/10.2305/IUCN.UK.2008.RLTS.T2155A9300617.en>. Downloaded on 03 March 2017.
92. Csada, R. *Cardioderma cor*. *Mammal. Species* **1996**, *519*, 1-4.
93. Mickleburgh, S.; Hutson, A.M.; Racey, P.A.; Cardiff, S.; Bergmans, W. *Coleura afra*. The IUCN Red List of Threatened Species **2008**, e.T5113A11115576. <http://dx.doi.org/10.2305/IUCN.UK.2008.RLTS.T5113A11115576.en>. Downloaded on 03 March 2017.
94. Rydell, J. *Eptesicus nilssonii*. *Mammal. Species* **1993**, *430*, 1-7.
95. Hunt, J.L.; McWilliams, L.A.; Best, T.L.; Smith, K.G. *Eumops bonariensis*. *Mammal. Species*, **2003**, *733*, 1-5.
96. Peereboom, D.; van Lieshout, S.; Jeffery, K.J.; Bergmans, W. First record and echolocation call of *Glauconycteris argentata* (Dobson, 1875) from Gabon. *African Bat Conservation News* **2012**, *27*, 3-5.
97. Lassieur, S.; Wilson, D.W. *Lonchorhina aurita*. *Mammal. Species* **1989**, *347*, 1-4.
98. Holloway, G.L.; Barclay, R.M. *Myotis ciliolabrum*. *Mammal. Species* **2001**, *670*, 1-5.
99. Daniel, M.J. The New Zealand short-tailed bat, *Mystacina tuberculata*; a review of present knowledge. *New Zealand J. Zoo.* **1979**, *6*(2), 357-370.
100. Long, J.K. *Otomops martiensseni*. *Mammal. Species* **1995**, *493*, 1-5.
101. Brown, K.M.; Dunlop, J. *Rhinolophus landeri*. *Mammal. Species* **1997**, *567*, 1-4.
102. Qumsiyeh, M.B.; Jones, J.K. *Rhinopoma hardwickii* and *Rhinopoma muscatellum*. *Mammal. Species* **1986**, *263*, 1-5.
103. Dengis, C.A. *Taphozous mauritanus*. *Mammal. Species* **1996**, *522*, 1-5.
104. Csorba, G. The distribution of the great evening bat *la io* in the Indo-Malayan region. *Myotis* **1998**, *36*, 197-201.
105. Csorba, G.; Bumrungsri, S.; Francis, C.; Bates, P.; Gumal, M.; Kingston, T. *Hipposideros lekaguli*. The IUCN Red List of Threatened Species **2008**, e.T10144A3174182. <http://dx.doi.org/10.2305/IUCN.UK.2008.RLTS.T10144A3174182.en>. Downloaded on 07 March 2017.
106. Dechmann, D.K.; Kerth, G. My home is your castle: roost making is sexually selected in the bat *Lophostoma silvicolium*. *J. Mamm.* **2008**, *89*(6), 1379-1390.
107. McKenzie, N.; Hall, L. *Rhinonictes aurantia*. The IUCN Red List of Threatened Species **2008**, e.T19589A8983139. <http://dx.doi.org/10.2305/IUCN.UK.2008.RLTS.T19589A8983139.en>. Downloaded on 07 March 2017.
108. Bates, P.; Bumrungsri, S.; Csorba, G. *Rhinolophus thomasi*. The IUCN Red List of Threatened Species **2008**, e.T19573A8980523. <http://dx.doi.org/10.2305/IUCN.UK.2008.RLTS.T19573A8980523.en>. Downloaded on 07 March 2017.
109. Smith, A.T.; Johnston, C.H.; Jones, G.; Rossiter, S. *Rhinolophus rex*. The IUCN Red List of Threatened Species **2008**, e.T19562A8977955. <http://dx.doi.org/10.2305/IUCN.UK.2008.RLTS.T19562A8977955.en>. Downloaded on 07 March 2017.

110. Law, B. S.; Anderson, J. Roost preferences and foraging ranges of the eastern forest bat *Vespadelus pumilus* under two disturbance histories in northern New South Wales, Australia. *Austral. Ecol.* **2000**, *25*(4), 352-367.
111. Medway, L., & Marshall, A. G. Roost-site selection among flat-headed bats (*Tylonycteris* spp.). *J. Zoo.* **1970**, *161*(2), 237-245.
112. Kofoky, A. Conservation of endemic Malagasy trident-nosed bats *Triaenops rufus* and *Triaenops furculus*. Rufford Small Grants Foundation: London, GBR, 2006.
113. Smith, P.; Pheasey, H.; Atkinson, K.; Miller, J. Records of the Phyllostomine bats *Tonatia bidens* (Spix, 1823) and *Lophostoma silvicolu*m d' Orbigny, 1836 (Chiroptera, Phyllostomidae) associated with human dwellings in Paraguay. *Chiropt. Neotropical* **2013**, *18*(2), 1139-1143.
114. Csorba, G.; Bumrungsri, S.; Francis, C.; Bates, P.; Ong, P.; Gumal, M.; Kingston, T.; Heaney, L.; Balete, D.; Molur, S.; Srinivasulu, C. *Chaerephon plicatus*. The IUCN Red List of Threatened Species **2014**, e.T4316A67361960. <http://dx.doi.org/10.2305/IUCN.UK.2014-3.RLTS.T4316A67361960.en>. Downloaded on 07 March 2017.
115. Sampaio, E.; Lim, B.; Peters, S. *Dermanura cinerea*. The IUCN Red List of Threatened Species **2016**, e.T2124A22000480. <http://dx.doi.org/10.2305/IUCN.UK.2016-2.RLTS.T2124A22000480.en>. Downloaded on 08 March 2017.
116. Trajano, E. Protecting caves for bats or bats for caves? *Chiropt. Neotropical* **2012**, *1*(2), 19-21.
117. Villalobos-Chaves, D.; Murillo, J.V.; Valerio, E.R.; Keeley, B.W.; Rodríguez-Herrera, B. Understory bat roosts, availability and occupation patterns in a Neotropical rainforest of Costa Rica. *Revista de Biología Trop.* **2016**, *64*(3), 1333-1343.
118. Vleut, I.; Galindo-González, J.; Boer, W. F.; Levy-Tacher, S.I.; Vazquez, L.B. Niche differentiation and its relationship with food abundance and vegetation complexity in four frugivorous bat species in Southern Mexico. *Biotropica* **2015**, *47*(5), 606-615.
119. Mickleburgh, S.; Hutson, A.M.; Bergmans, W.; Taylor, P.J.; Aulagnier, S.; Fahr, J. *Cloeotis percivali*. The IUCN Red List of Threatened Species **2008**, e.T4983A11106463. <http://dx.doi.org/10.2305/IUCN.UK.2008.RLTS.T4983A11106463.en>. Downloaded on 08 March 2017.
120. Voss, R. S.; Fleck, D.W.; Strauss, R. E.; Velazco, P. M.; Simmons, N.B. Roosting ecology of Amazonian bats: evidence for guild structure in hyperdiverse mammalian communities. *Amer. Mus. Novitates* **2016**, *3870*, 1-43.
121. Dávalos, L.M. Molecular phylogeny of funnel-eared bats (Chiroptera: Natalidae), with notes on biogeography and conservation. *Mol. Phylog. Evol.* **2005**, *37*(1), 91-103.
122. Alcaldé, J.; Benda, P.; Juste, J. *Rhinolophus mehelyi*. The IUCN Red List of Threatened Species **2016**, e.T19519A21974380. <http://dx.doi.org/10.2305/IUCN.UK.2016-2.RLTS.T19519A21974380.en>. Downloaded on 08 March 2017.
123. Zhang, L.; Jones, G.; Zhang, J.; Zhu, G.; Parsons, S.; Rossiter, S. J.; Zhang, S. Recent surveys of bats (Mammalia: Chiroptera) from China. I. Rhinolophidae and Hipposideridae. *Acta Chiropt.* **2009**, *11*(1), 71-88.
124. Francis, C.; Bates, P. *Hipposideros pratti*. The IUCN Red List of Threatened Species **2008**, e.T10155A3176469. <http://dx.doi.org/10.2305/IUCN.UK.2008.RLTS.T10155A3176469.en>. Downloaded on 08 March 2017.
125. Juste, J.; Paunovi, M. *Hypsugo savii*. The IUCN Red List of Threatened Species **2016**, e.T44856A22072380. <http://dx.doi.org/10.2305/IUCN.UK.2016-3.RLTS.T44856A22072380.en>. Downloaded on 08 March 2017.
126. Francis, C.M.; Barrett, P. A guide to the mammals of Southeast Asia. Princeton University Press: Princeton, NJ, USA, 2008, 392.
127. Bumrungsri, S.; Bates, P.; Molur, S.; Srinivasulu, C. *Miniopterus pusillus*. The IUCN Red List

- of Threatened Species **2008**, e.T13569A4183112.  
<http://dx.doi.org/10.2305/IUCN.UK.2008.RLTS.T13569A4183112.en>. Downloaded on 08 March 2017.
128. Andriafidison, D.; Cardiff, S.G.; Goodman, S.M.; Hutson, A.M.; Jenkins, R.K.B.; Kofoky, A.F.; Racey, P.A.; Ranivo, J.; Ratrimomanarivo, F.H.; Razafimanahaka, H.J. *Mormopterus jugularis*. The IUCN Red List of Threatened Species **2008**, e.T13882A4361171.  
<http://dx.doi.org/10.2305/IUCN.UK.2008.RLTS.T13882A4361171.en>. Downloaded on 08 March 2017.
  129. Rosell-Ambal, G.; Tabaranza, B.; Heaney, L.; Gonzalez, J.C.; Molur, S.; Srinivasulu, C. *Myotis horsfieldii*. The IUCN Red List of Threatened Species **2008**, e.T14166A4413659.  
<http://dx.doi.org/10.2305/IUCN.UK.2008.RLTS.T14166A4413659.en>. Downloaded on 08 March 2017.
  130. Juste, J.; Paunovi, M. *Nyctalus leisleri*. The IUCN Red List of Threatened Species **2016**, e.T14919A22016159. <http://dx.doi.org/10.2305/IUCN.UK.2016-2.RLTS.T14919A22016159.en>. Downloaded on 08 March 2017.
  131. Jacobs, D.; Cotterill, F.P.D.; Taylor, P.J. *Rhinolophus alcyone*. The IUCN Red List of Threatened Species **2008**, e.T19523A8952923.  
<http://dx.doi.org/10.2305/IUCN.UK.2008.RLTS.T19523A8952923.en>. Downloaded on 08 March 2017.
  132. Arroyo-Cabrales, J.; Álvarez-Castañeda, S.T. *Macrotus californicus*. The IUCN Red List of Threatened Species **2008**, e.T12652A3369341.  
<http://dx.doi.org/10.2305/IUCN.UK.2008.RLTS.T12652A3369341.en>. Downloaded on 08 March 2017.
  133. Molur, S.; Marimuthu, G.; Srinivasulu, C.; Mistry, S.; Hutson, A.M.; Bates, P.J., ... & Priya, A. B. Status of South Asian Chiroptera. In *Conservation Action Management Plan (CAMP) Workshop Report*. Zoo Outreach Organisation: Coimbatore, IND, 2002, 36.
  134. Reiter, J.; Curio, E. Home range, roost switching, and foraging area in a Philippine fruit bat (*Ptenochirus jagori*). *Ecotropica* **2001**, 7, 109-113.
  135. Csorba, G.; Hutson, A.M. *Nyctalus noctula*. The IUCN Red List of Threatened Species **2016**, e.T14920A22015682. <http://dx.doi.org/10.2305/IUCN.UK.2016-2.RLTS.T14920A22015682.en>. Downloaded on 08 March 2017.
  136. Mickleburgh, S.; Hutson, A.M.; Bergmans, W.; Cotterill, F.P.D. *Mops condylurus*. The IUCN Red List of Threatened Species **2008**, e.T13838A4355738.  
<http://dx.doi.org/10.2305/IUCN.UK.2008.RLTS.T13838A4355738.en>. Downloaded on 08 March 2017.
  137. De Thoisy, B.; Bourhy, H.; Delaval, M.; Pontier, D.; Dacheux, L.; Darcissac, E.; Donato, D.; Guidez, A.; Larrous, F.; Lavenir, R.; Salmier, A.; Lacoste, V.; Lavergne, A. Bioecological drivers of rabies virus circulation in a Neotropical bat community. *PLoS Negl. Trop. Dis.* **2016**, 10(1), e0004378.
  138. Divoll, T.J.; Buck, D.G. Noteworthy field observations of cave roosting bats in Honduras. *Mastozoologica Neotropical* **2013**, 20(1), 149-151.
  139. Bates, P.; Csorba, G.; Molur, S.; Srinivasulu, C. *Scotophilus heathii*. The IUCN Red List of Threatened Species **2008**, e.T20067A9142155.  
<http://dx.doi.org/10.2305/IUCN.UK.2008.RLTS.T20067A9142155.en>. Downloaded on 08 March 2017.
  140. Monadjem, A.; Raabe, T.; Dickerson, B.; Silvy, N.; McCleery, R. Roost use by two sympatric species of *Scotophilus* in a natural environment. *South African J. Wildl. Res.* **2010**, 40(1), 73-76.

141. Clews, L.L. Observations on roost use by the yellow-bellied sheath-tail-bat (*Saccolaimus flaviventris*) in northern New South Wales, Australia. *Aust. Mamm.* **2016**, 39(1), 95-99.
142. Ith, S.; Soisook, P.; Bumrungsri, S.; Kingston, T.; Puechmaille, S.J.; Struebig, M.J.; Bu, S.S.H.; Thong, V.D.; Furey, N.M.; Thomas, N.M.; Bates, P.J. A taxonomic review of *Rhinolophus coelophyllus* Peters 1867 and *R. shameli* Tate 1943 (Chiroptera: Rhinolophidae) in continental Southeast Asia. *Acta Chiropt.* **2011**, 13(1), 41-59.
143. Thorn, E.; Peterhans, J.K.; Huhndorf, M.; Hutterer, R.; Kityo, R. Small mammals of Uganda. *Zoologisches Forschungsmuseum Alexander Koenig* **2009**.
144. Perveen, F.; Rahman, F.U. Characteristics of the first record of bat (Mammalia: Chiroptera) fauna from Peshawar and adjacent areas, Khyber Pakhtunkhwa, Pakistan. *Glob. J. Animal Scient. Res.* **2014**, 3(1), 148-160.
145. Lee, Y. F.; Lee, L. L. Food habits of Japanese pipistrelles *Pipistrellus abramus* (Chiroptera: Vespertilionidae) in northern Taiwan. *Zool. Stud.* **2005**, 44(1), 95-101.
146. Andriafidison, D.; Cardiff, S.G.; Goodman, S.M.; Hutson, A.M.; Jenkins, R.K.B.; Kofoky, A.F.; Racey, P.A.; Ranivo, J.; Ratrimomanarivo, F.H.; Razafimanahaka, H.J. *Paratriaenops furculus*. The IUCN Red List of Threatened Species **2008**, e.T22089A9355759. <http://dx.doi.org/10.2305/IUCN.UK.2008.RLTS.T22089A9355759.en>. Downloaded on 08 March 2017.
147. Gonzalez, E.; Barquez, R.; Miller, B. *Lasiurus blossevillei*. The IUCN Red List of Threatened Species **2016**, e.T88151055A22120040. <http://dx.doi.org/10.2305/IUCN.UK.2016-1.RLTS.T88151055A22120040.en>. Downloaded on 08 March 2017.
148. Arroyo-Cabral, J.; Álvarez-Castañeda, S.T. *Lasiurus xanthinus*. The IUCN Red List of Threatened Species **2008**, e.T41532A10492544. <http://dx.doi.org/10.2305/IUCN.UK.2008.RLTS.T41532A10492544.en>. Downloaded on 08 March 2017.
149. Bakwo Fils, E.M.; Kaleme, P. *Myonycteris torquata*. The IUCN Red List of Threatened Species **2016**, e.T84463104A22046504. <http://dx.doi.org/10.2305/IUCN.UK.2016-1.RLTS.T84463104A22046504.en>. Downloaded on 09 March 2017.
150. Helgen, K.; Allison, A.; Bonaccorso, F.; Hamilton, S. *Dobsonia anderseni*. The IUCN Red List of Threatened Species **2008**, e.T136374A4282621. <http://dx.doi.org/10.2305/IUCN.UK.2008.RLTS.T136374A4282621.en>. Downloaded on 09 March 2017.
151. Taylor, P. *Epomophorus labiatus*. The IUCN Red List of Threatened Species **2016**, e.T84457881A22122505. <http://dx.doi.org/10.2305/IUCN.UK.2016-1.RLTS.T84457881A22122505.en>. Downloaded on 09 March 2017.
152. Mickleburgh, S.P.; Hutson, A.M.; Racey, P.A. Old World fruit bats. An action plan for their conservation. IUCN Species Survival Commission: Gland, CHE, 1992.
153. Barquez, R.M.; Mares, M.A.; Braun, J.K. The bats of Argentina. *Special Publications*, Museum of Texas Tech University: Lubbock, TX, USA, 1999, 42.
154. Juste, J. *Eptesicus isabellinus*. The IUCN Red List of Threatened Species **2016**, e.T85200107A85200275. <http://dx.doi.org/10.2305/IUCN.UK.2016-2.RLTS.T85200107A85200275.en>. Downloaded on 09 March 2017.
155. Mickleburgh, S.; Hutson, A.M.; Bergmans, W.; Fahr, J. *Hipposideros abae*. The IUCN Red List of Threatened Species **2008**, e.T10109A3162314. <http://dx.doi.org/10.2305/IUCN.UK.2008.RLTS.T10109A3162314.en>. Downloaded on 09 March 2017.
156. Decher, J.; Hoffmann, A.; Schaer, J.; Norris, R.W.; Kadjo, B.; Astrin, J.; Monadjem, A.; Hutterer, R. Bat diversity in the Simandou mountain range of Guinea, with the description of a

- new white-winged vespertilionid. *Acta Chiropt.* **2015**, 17(2), 255-282.
157. Mickleburgh, S.; Hutson, A.M.; Bergmans, W. *Hipposideros gigas*. The IUCN Red List of Threatened Species 2008, e.T44687A10925812.  
<http://dx.doi.org/10.2305/IUCN.UK.2008.RLTS.T44687A10925812.en>. Downloaded on 09 March 2017.
  158. Mickleburgh, S.; Hutson, A.M.; Bergmans, W.; Cotterill, F.P.D. *Hipposideros vittatus*. The IUCN Red List of Threatened Species 2008, e.T135485A4129766.  
<http://dx.doi.org/10.2305/IUCN.UK.2008.RLTS.T135485A4129766.en>. Downloaded on 09 March 2017.
  159. Barquez, R.; Diaz, M. *Histiotus montanus*. The IUCN Red List of Threatened Species **2016**, e.T10202A22098875. <http://dx.doi.org/10.2305/IUCN.UK.2016-3.RLTS.T10202A22098875.en>. Downloaded on 09 March 2017.
  160. Carvalho, W.D.; Martins, M. A.; Dias, D.; Esbérard, C.E.L. Extension of geographic range, notes on taxonomy and roosting of *Histiotus montanus* (Chiroptera: Vespertilionidae) in southeastern Brazil. *Mammalia* **2013**, 77(3), 341-346.
  161. Bates, P.J.; Struebig, M.J.; Hayes, B.D.; Furey, N.M.; Mya, K.M.; Thong, V.D.; Tien, P.D.; Son, N.T.; Harrison, D.L.; Francis, C.M.; Csorba, G. A new species of *Kerivoula* (Chiroptera: Vespertilionidae) from Southeast Asia. *Acta Chiropt.* **2007**, 9(2), 323-337.
  162. Rodrigues L. Population ecology of two species of cave-dwelling bats (*Miniopterus schreibersii* and *Myotis myotis*). PhD Thesis. University of Lisbon: Lisbon, PRT, 2008.
  163. Maeda, K. *Miniopterus fuscus*. The IUCN Red List of Threatened Species **2008**, e.T13564A4168569. <http://dx.doi.org/10.2305/IUCN.UK.2008.RLTS.T13564A4168569.en>. Downloaded on 09 March 2017.
  164. Goodman, S.M.; Maminirina, C.P.; Bradman, H.M.; Christidis, L.; Appleton, B.R. Patterns of morphological and genetic variation in the endemic Malagasy bat *Miniopterus gleni* (Chiroptera: Miniopteridae), with the description of a new species, *M. griffithsi*. *J. Zoo. Sys. Evol. Res.* **2010**, 48(1), 75-86.
  165. Tortosa, P.; Dsouli, N.; Gomard, Y.; Ramasindrazana, B.; Dick, C.W.; Goodman, S.M. Evolutionary history of Indian Ocean nycteribiid bat flies mirroring the ecology of their hosts. *PloS ONE* **2013**, 8(9), e75215.
  166. Ramasindrazana, B.; Goodman, S.M. Bats of the Beanka Forest, a limestone karstic zone near Maintirano, central western Madagascar. *Malagasy Nature* **2011**, 5, 121-128.
  167. Schlitter, D. *Miniopterus inflatus*. The IUCN Red List of Threatened Species **2008**, e.T13565A4170630. <http://dx.doi.org/10.2305/IUCN.UK.2008.RLTS.T13565A4170630.en>. Downloaded on 09 March 2017.
  168. Bonaccorso, F.; Reardon, T. *Miniopterus magnater*. The IUCN Red List of Threatened Species **2008**, e.T13566A4173040.  
<http://dx.doi.org/10.2305/IUCN.UK.2008.RLTS.T13566A4173040.en>. Downloaded on 09 March 2017.
  169. Andriafidison, D.; Cardiff, S.G.; Goodman, S.M.; Hutson, A.M.; Jenkins, R.K.B.; Kofoky, A.F.; Racey, P.A.; Ranivo, J.; Ratrimomanarivo, F.H.; Razafimanahaka, H.J. *Miniopterus manavi*. The IUCN Red List of Threatened Species **2008**, e.T40040A10310108.  
<http://dx.doi.org/10.2305/IUCN.UK.2008.RLTS.T40040A10310108.en>. Downloaded on 09 March 2017.
  170. Rupprecht, C.E.; Turmelle, A.; Kuzmin, I.V. A perspective on lyssavirus emergence and perpetuation. *Curr. Op. Virol.* **2011**, 1(6), 662-670.
  171. McWilliam, A.N. Mating system of the bat *Miniopterus minor* (Chiroptera: Vespertilionidae) in Kenya, East Africa: a lek? *Ethology* **1990**, 85(4), 302-312.



172. Goodman, S.M.; Ryan, K.E.; Maminirina, C.P.; Fahr, J.; Christidis, L.; Appleton, B. Specific status of populations on Madagascar referred to *Miniopterus fraterculus* (Chiroptera: Vespertilionidae), with description of a new species. *J. Mammal.* **2007**, *88*(5), 1216-1229.
173. Andriafidison, D.; Cardiff, S.G.; Goodman, S.M.; Hutson, A.M.; Jenkins, R.K.B.; Kofoky, A.F.; Racey, P.A.; Ranivo, J.; Ratrimomanarivo, F.H.; Razafimanahaka, H.J. *Mops leucostigma*. The IUCN Red List of Threatened Species **2014**, e.T40024A67363106. <http://dx.doi.org/10.2305/IUCN.UK.2014-3.RLTS.T40024A67363106.en>. Downloaded on 09 March 2017.
174. Benda, P.; Ruedi, M.; Uhrin, M. First record of *Myotis alcathoe* (Chiroptera: Vespertilionidae) in Slovakia. *Folia Zoologica-Praha* **2003**, *52*(4), 359-366.
175. Csorba, G.; Francis, C. *Myotis altarium*. The IUCN Red List of Threatened Species **2008**, e.T14141A4408331. <http://dx.doi.org/10.2305/IUCN.UK.2008.RLTS.T14141A4408331.en>. Downloaded on 09 March 2017.
176. Piraccini, R. *Myotis emarginatus*. The IUCN Red List of Threatened Species **2016**, e.T14129A22051191. <http://dx.doi.org/10.2305/IUCN.UK.2016-2.RLTS.T14129A22051191.en>. Downloaded on 09 March 2017.
177. Smith, A.T.; Johnston, C.H.; Jones, G.; Rossiter, S. *Myotis fimbriatus*. The IUCN Red List of Threatened Species **2008**, e.T14158A4412022. <http://dx.doi.org/10.2305/IUCN.UK.2008.RLTS.T14158A4412022.en>. Downloaded on 09 March 2017.
178. Tsytsulina, K. *Myotis macrodactylus*. The IUCN Red List of Threatened Species **2008**, e.T14177A4415822. <http://dx.doi.org/10.2305/IUCN.UK.2008.RLTS.T14177A4415822.en>. Downloaded on 09 March 2017.
179. Reardon, T.; Thomson, B. *Myotis macropus*. The IUCN Red List of Threatened Species **2008**, e.T136697A4328885. <http://dx.doi.org/10.2305/IUCN.UK.2008.RLTS.T136697A4328885.en>. Downloaded on 09 March 2017.
180. Smith, A.T.; Johnston, C.H.; Jones, G.; Rossiter, S. *Myotis pequinus*. The IUCN Red List of Threatened Species **2008**, e.T14190A4418280. <http://dx.doi.org/10.2305/IUCN.UK.2008.RLTS.T14190A4418280.en>. Downloaded on 09 March 2017.
181. Hutson, A.M.; Racey, P.A.; Goodman, S.; Jacobs, D. *Neoromicia nana*. The IUCN Red List of Threatened Species **2014**, e.T44923A67357605. <http://dx.doi.org/10.2305/IUCN.UK.2014-3.RLTS.T44923A67357605.en>. Downloaded on 09 March 2017.
182. Mickleburgh, S.; Hutson, A.M.; Bergmans, W. *Nycteris hispida*. The IUCN Red List of Threatened Species **2008**, e.T14930A4477525. <http://dx.doi.org/10.2305/IUCN.UK.2008.RLTS.T14930A4477525.en>. Downloaded on 09 March 2017.
183. Andriafidison, D.; Cardiff, S.G.; Goodman, S.M.; Hutson, A.M.; Jenkins, R.K.B.; Kofoky, A.F.; Racey, P.A.; Ranivo, J.; Ratrimomanarivo, F.H.; Razafimanahaka, H.J. *Otomops madagascariensis*. The IUCN Red List of Threatened Species **2008**, e.T136564A4311433. <http://dx.doi.org/10.2305/IUCN.UK.2008.RLTS.T136564A4311433.en>. Downloaded on 09 March 2017.
184. Hutson, A.M.; Suyanto, A.; Kingston, T. *Megaerops kusnotoi*. The IUCN Red List of Threatened Species **2008**, e.T12945A3400651. <http://dx.doi.org/10.2305/IUCN.UK.2008.RLTS.T12945A3400651.en>. Downloaded on 10 March 2017.
185. Weber, N.; Kalko, E.K.; Fahr, J. A first assessment of home range and foraging behaviour of the African long-tongued bat *Megaloglossus woermanni* (Chiroptera: Pteropodidae) in a

- heterogeneous landscape within the Lama Forest Reserve, Benin. *Acta Chiropt.* **2009**, 11(2), 317-329.
186. Pavey, C.R.; Burwell, C.J. Foraging ecology of the horseshoe bat, *Rhinolophus megaphyllus* (Rhinolophidae), in eastern Australia. *Wildl. Res.* **2004**, 31(4), 403-413.
  187. Benda, P.; Coroiu, I.; Paunovi, M. *Pipistrellus pygmaeus*. The IUCN Red List of Threatened Species **2016**, e.T136649A21990234. <http://dx.doi.org/10.2305/IUCN.UK.2016-2.RLTS.T136649A21990234.en>. Downloaded on 11 March 2017.
  188. Norwak, R.M. Walker's Mammals of the World Volume 1 Fifth Edition. The John Hopkins University Press: Baltimore, MD, USA, 1991, 376-382.
  189. Eisenberg, J. F.; Redford, K.H. Mammals of the Neotropics, Volume 3: Ecuador, Bolivia, Brazil (Vol. 3). University of Chicago Press: Chicago, IL, USA, 2000.
  190. Wood, S. Geographic distribution and composition of the parasite assemblage of the insectivorous bat, *Miniopterus natalensis* (Chiroptera: Miniopteridae), in South Africa. Doctoral dissertation, University of Cape Town, Cape Town, ZAF, 2012.
  191. Gazarini, J.; Bernardi, I.P. Mammalia, Chiroptera, Molossidae, *Molossops neglectus*: first record in the state of Paraná, Brazil. *Check List* **2007**, 3(2), 123-125.
  192. Burnett, S.E.; Jennings, J.B.; Rainey, J.C.; Best, T.L. *Molossus bondae*. *Mammal. Species* **2001**, 668, 1-3.
  193. Francis, C.; Bates, P.; Bumrungsri, S.; Francis, N.; Csorba, G.; Molur, S.; Srinivasulu, C. *Murina aurata*. The IUCN Red List of Threatened Species **2008**, e.T13937A4367202. <http://dx.doi.org/10.2305/IUCN.UK.2008.RLTS.T13937A4367202.en>. Downloaded on 12 March 2017.
  194. Bates, P.J.; Nwe, T.; Bu, S.S.H.; Mie, K.M.; Swe, K.M.; Nyo, N.; Khaing, A.A.; Aye, N.N.; Toke, Y.Y.; Aung, N.N.; Thar, M.M.; Mackie, I. A review of the genera *Myotis*, *la*, *Pipistrellus*, *Hypsugo*, and *Arielulus* (Chiroptera: Vespertilionidae) from Myanmar (Burma), including three species new to the country. *Acta Chiropt.* **2005**, 7(2), 205-236.
  195. Yu-yan, Y.O.U. Influence on endemic bat *Myotis davidii* population size and genetic richness by the habitat cave interference. *J. Biol.* **2013**, 2, 006.
  196. Paz, S.I.T.; Martinez, M.P.T. Observations of bats of Cordoba and La Pampa Provinces, Argentina. *Occasional Papers*, Museum of Texas Tech University: Lubbock, TX, USA, 1998, 175.
  197. Ma, J.; Zhang, J.; Liang, B.; Zhang, L.; Zhang, S.; Metzner, W. Dietary characteristics of *Myotis ricketti* in Beijing, north China. *J. Mamm.* **2006**, 87(2), 339-344.
  198. Tang, Z. H., Zhang, G. L., Sheng, L. X., Hong, T. Y., Zhu, G. J., Yang, J., ... & Zhang, L. B. (2012). Alopecia in Rickett's big-footed bat *Myotis ricketti* (Chiroptera: Vespertilionidae) in relation to age and sex. *Zool. Stud.* **2012**, 51, 494-499.
  199. Reid, F. A field guide to the mammals of Central America and Southeast Mexico. Oxford University Press: Cambridge, GBR, 1997.
  200. Jacobs, D.; Cotterill, F.P.D.; Taylor, P.J.. *Neoromicia capensis*. The IUCN Red List of Threatened Species **2014**, e.T44918A67358046. <http://dx.doi.org/10.2305/IUCN.UK.2014-3.RLTS.T44918A67358046.en>. Downloaded on 14 March 2017.
  201. Fahr, J. *Nycteris nana* Dwarf slit-faced bat. In *Mammals of Africa, Vol. IV: Hedgehogs, Shrews and Bats*. Eds L. M. Happold, D.C.D. Happold. Bloomsbury: New York, NY, USA, 2013, 455-456.
  202. Cotterill, F.P.D. *Scotophilus nigrita*. The IUCN Red List of Threatened Species **2008**, e.T20070A9143235. <http://dx.doi.org/10.2305/IUCN.UK.2008.RLTS.T20070A9143235.en>. Downloaded on 14 March 2017.
  203. Chu, D.K.W.; Peiris, J.S.M.; Chen, H.; Guan, Y.; Poon, L.L.M. 2008. Genomic

- characterizations of bat coronaviruses (1A, 1B and HKU8) and evidence for co-infections in *Miniopterus* bats. *J. Gen. Virol.* **2008**, 89(5), 1282-1287.
204. Kuzmin, I.V.; Turmelle, A.S.; Agwanda, B.; Markotter, W.; Niezgoda, M.; Breiman, R.F.; Rupprecht, C.E. Commerson's leaf-nosed bat (*Hipposideros commersoni*) is the likely reservoir of Shimoni bat virus. *Vect. Borne Zoo. Dis.* **2011**, 11(11), 1465-1470.
205. Muñoz-Romo, M.; Herrera, E. Observaciones sobre la alimentación del murciélago frugívoro mayor *Artibeus lituratus* (Chiroptera: Phyllostomidae) en Venezuela. *Rev. Mex. Mastozool.* **2010**, 14, 51-58
